# Supplementary material
Source: PubMed Central journal article supplement (PMC9082392)

# Model predictors

## Age + Gender

## Age + Gender + dichotomized NFL

## Age + Gender + ALC + CRP + LDH

### A

Cohort 1

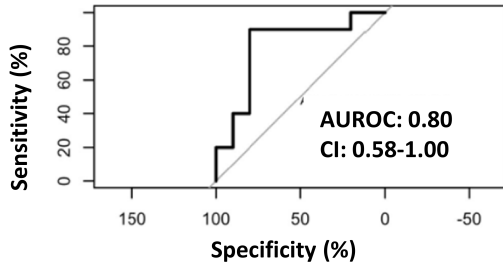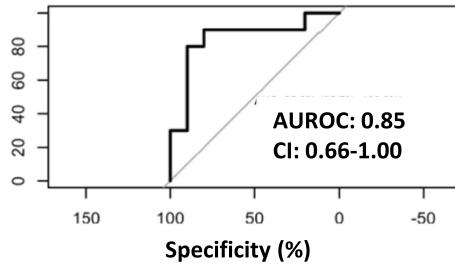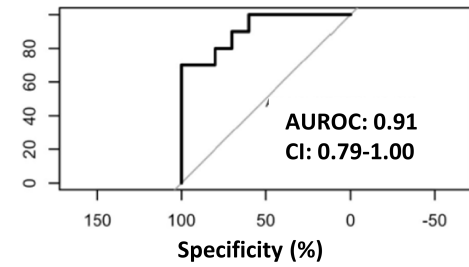

### B

Cohort 2 - T1

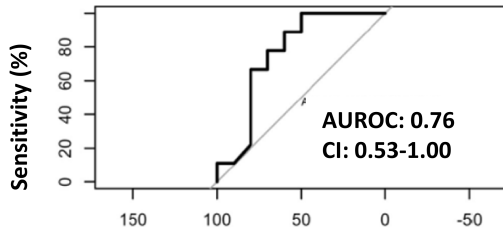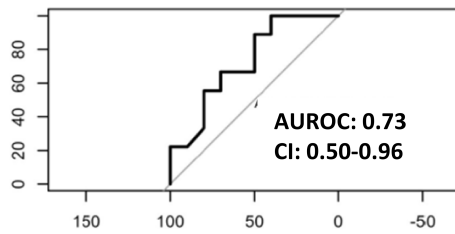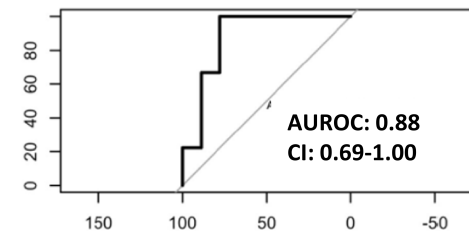

Cohort 2 - T2

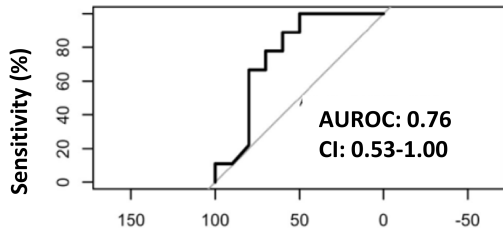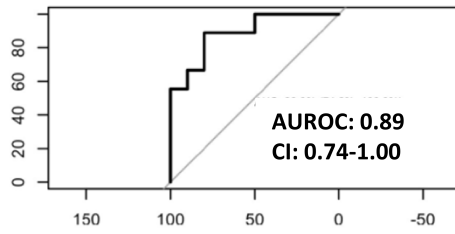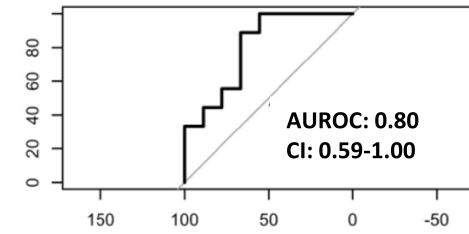

Cohort 2 - T3

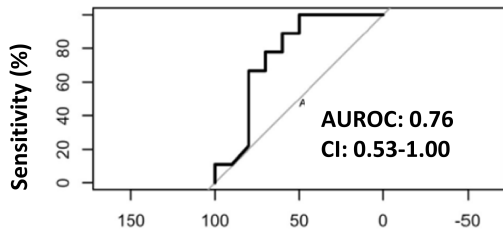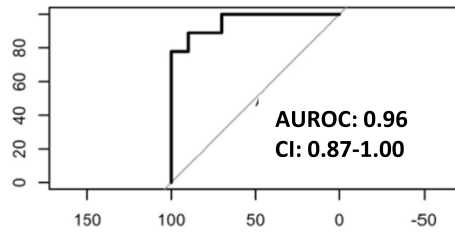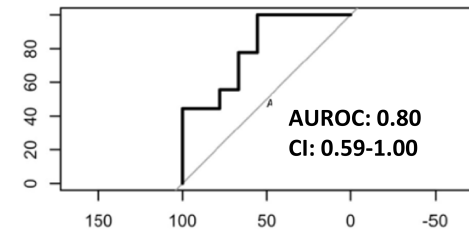

### C

Cohort 3

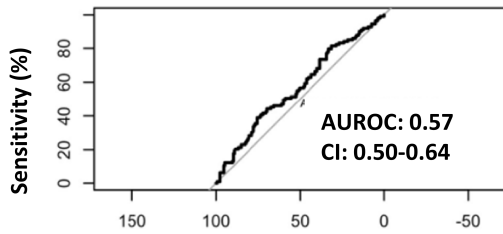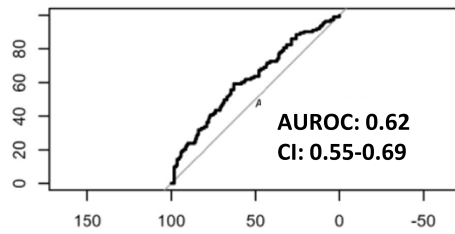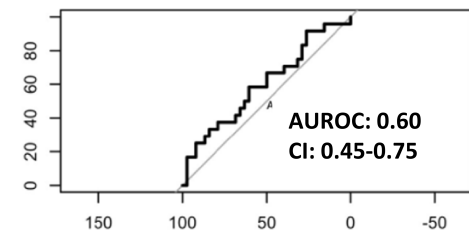

Supplement: ACN3-9-622-s002.pdf [file ACN3-9-622-s002.pdf]
