# Supplementary material
Source: PubMed Central journal article supplement (PMC9082392)
Supplement: ACN3-9-622-s003.pdf [file ACN3-9-622-s003.pdf]

### Survived

### Died

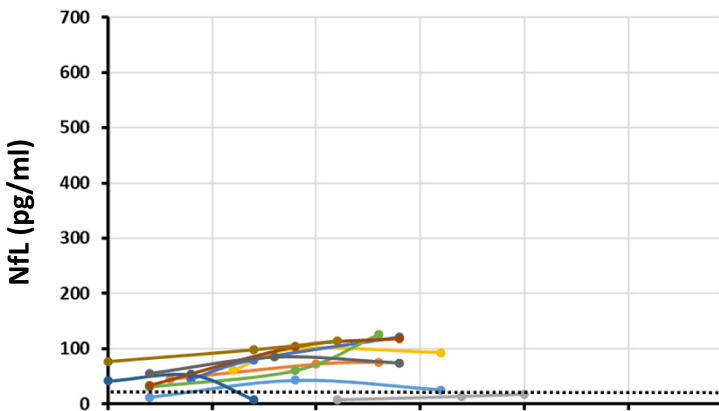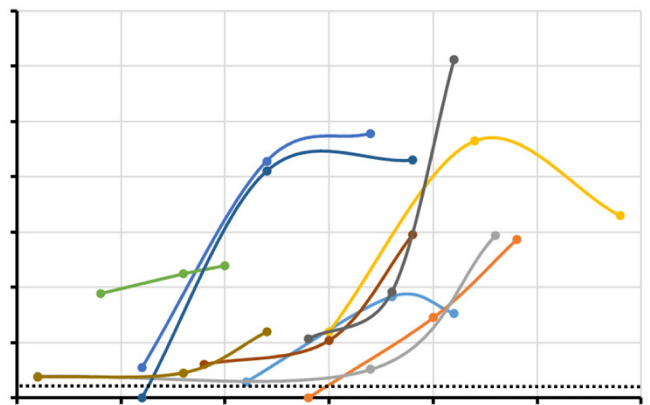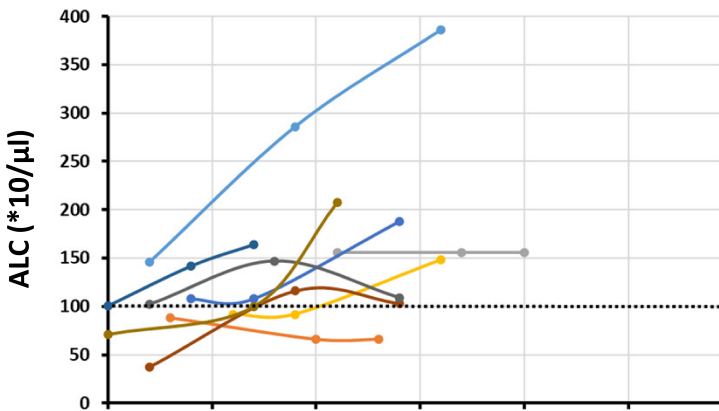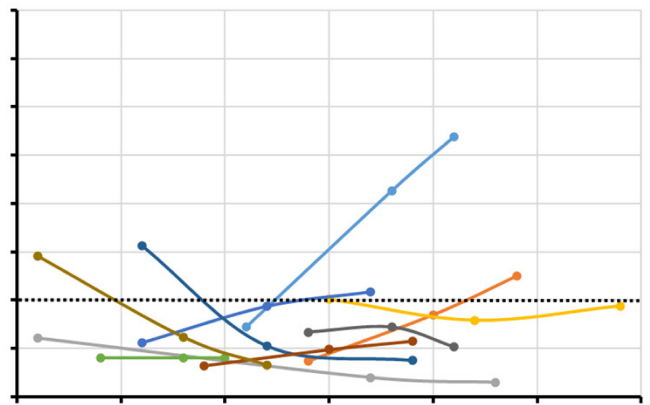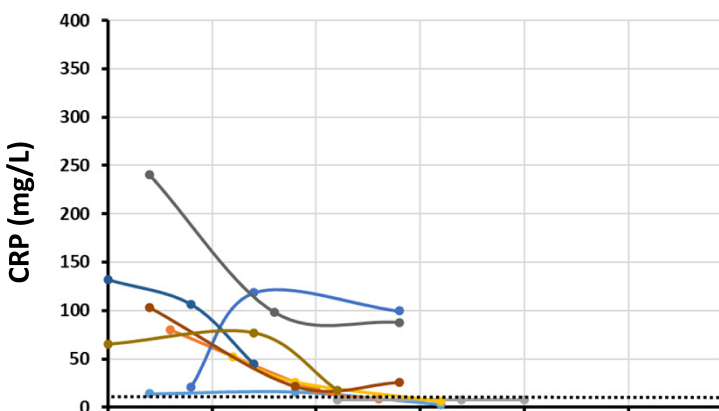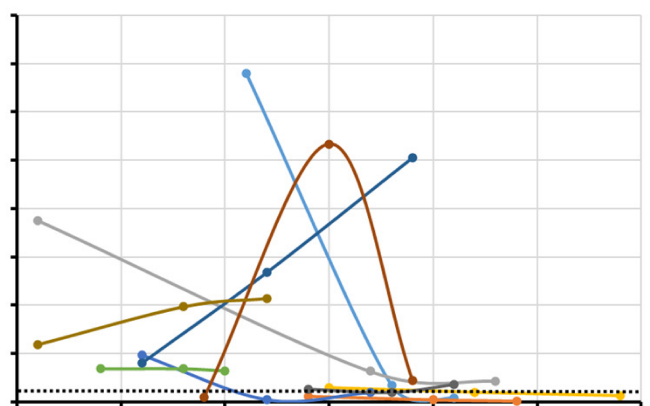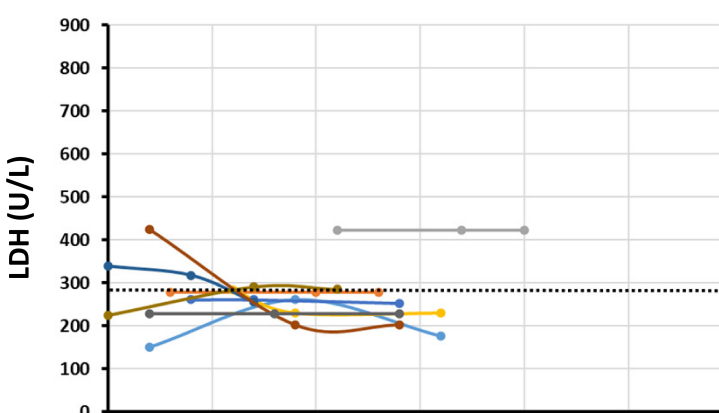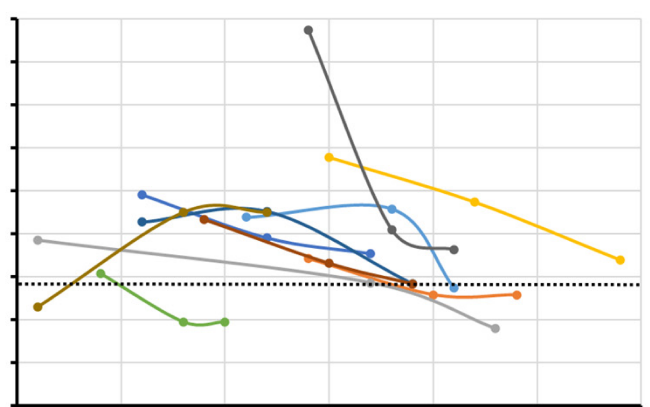

Number of days since hospital admission

Number of days since hospital admission
