# Supplementary material
Source: PubMed Central journal article supplement (PMC9082392)
Supplement: ACN3-9-622-s005.pdf [file ACN3-9-622-s005.pdf]

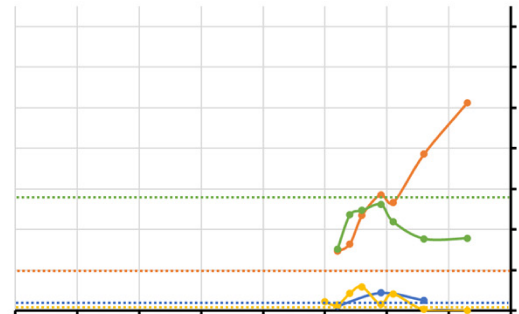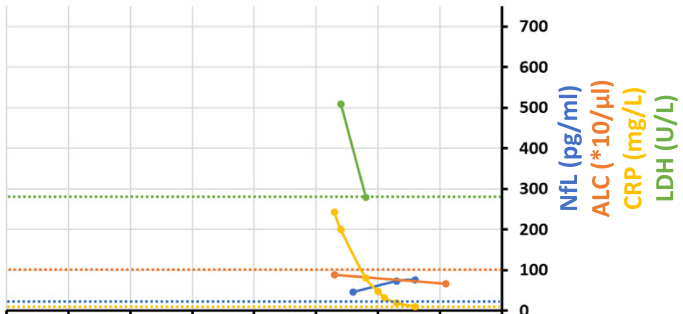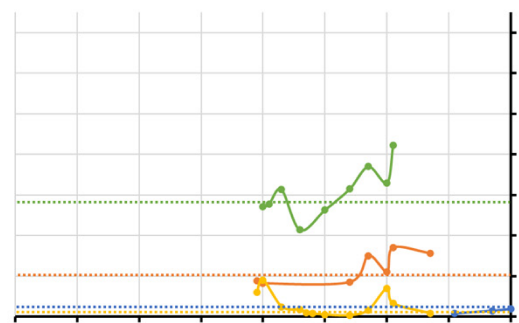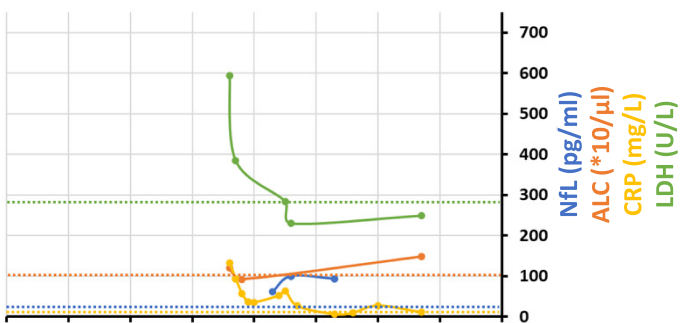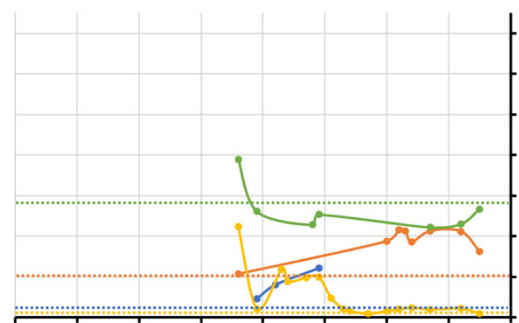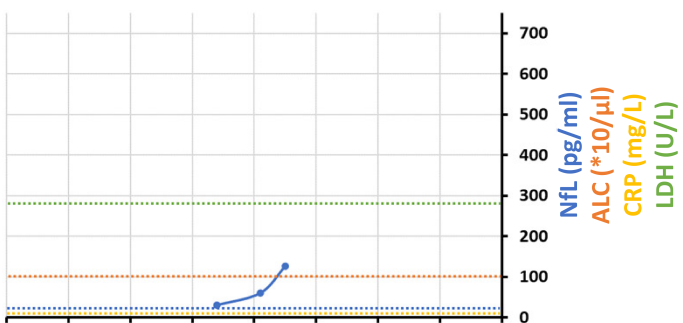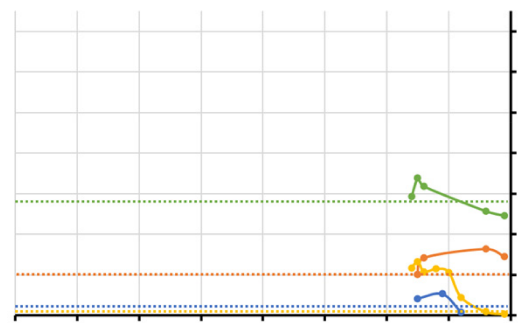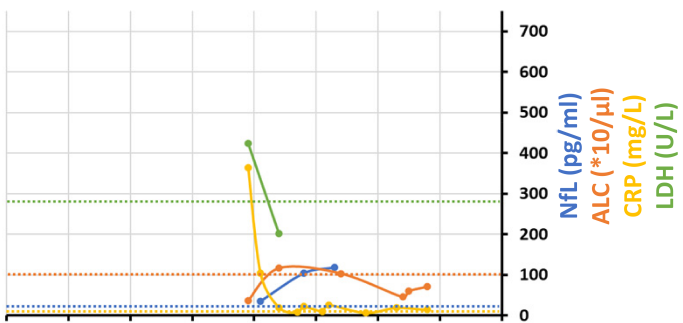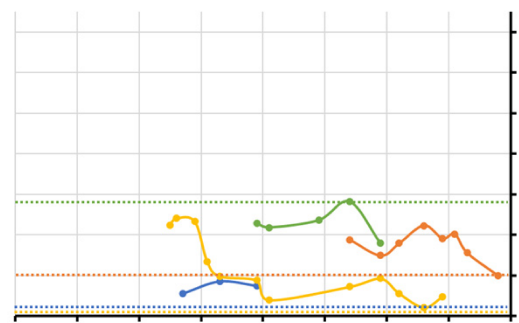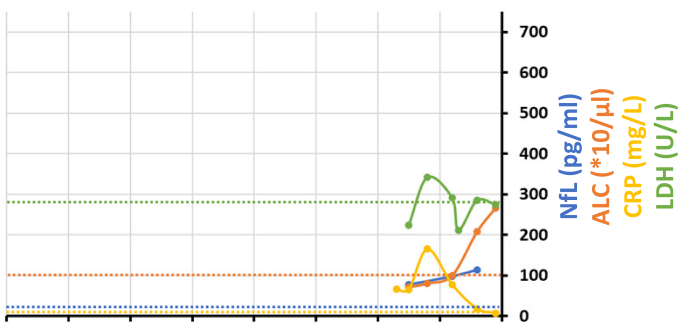

Number of days before discharge

Number of days before discharge

NfL (pg/ml)  
ALC (\*10/ $\mu$ l)  
CRP (mg/L)  
LDH (U/L)

NfL (pg/ml)  
ALC (\*10/ $\mu$ l)  
CRP (mg/L)  
LDH (U/L)

NfL (pg/ml)  
ALC (\*10/ $\mu$ l)  
CRP (mg/L)  
LDH (U/L)

NfL (pg/ml)  
ALC (\*10/ $\mu$ l)  
CRP (mg/L)  
LDH (U/L)

NfL (pg/ml)  
ALC (\*10/ $\mu$ l)  
CRP (mg/L)  
LDH (U/L)
