# Supplementary material
Source: PubMed Central journal article supplement (PMC9082392)

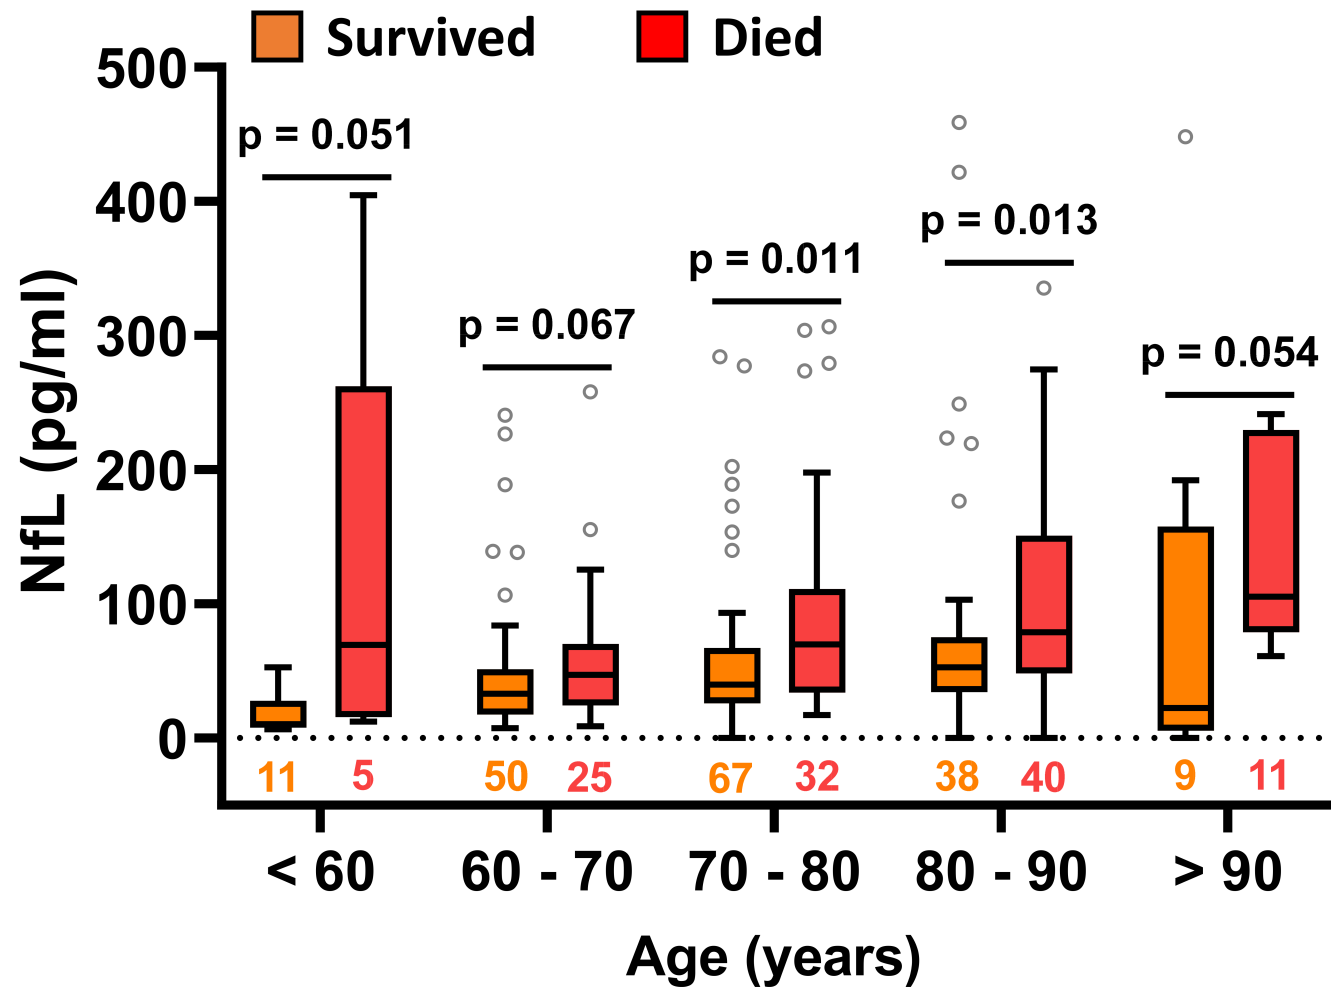

Supplement: ACN3-9-622-s006.pdf [file ACN3-9-622-s006.pdf]
