# Supplementary material
Source: PubMed Central journal article supplement (PMC9082392)

# Model predictors

## A

### Cohort 1

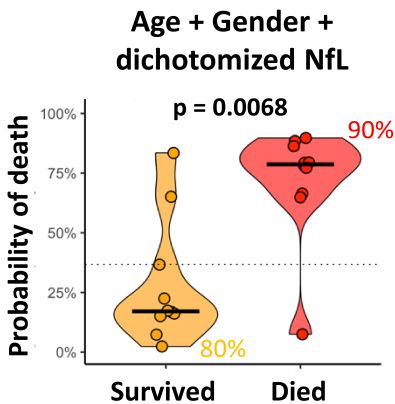

**Age + Gender + dichotomized NFL + dichotomized Comorbidities**

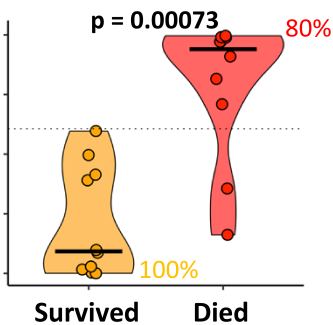

## B

### Cohort 2 – T1

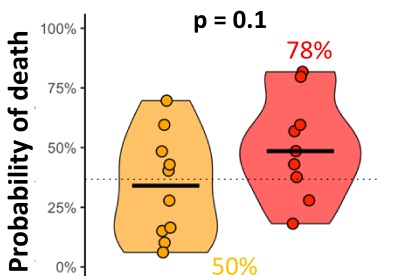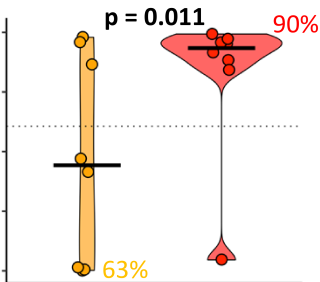

### Cohort 2 – T2

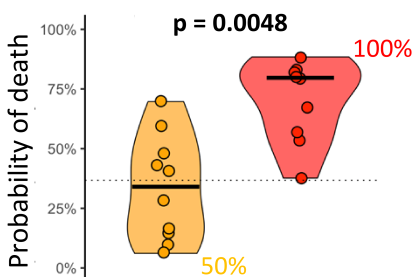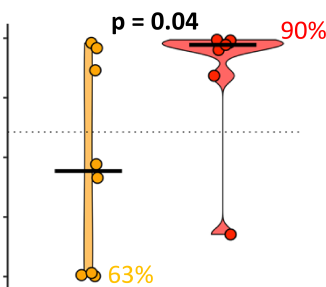

### Cohort 2 – T3

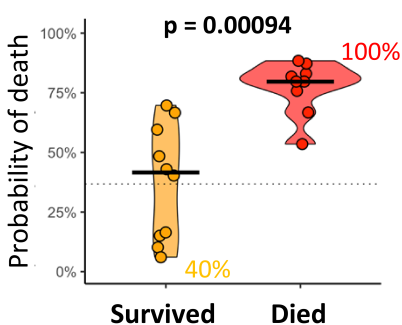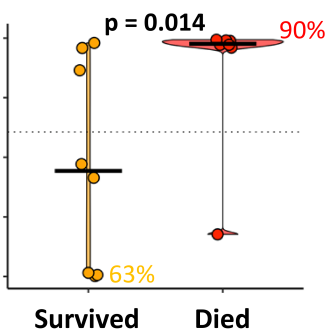

## C

### Cohort 3

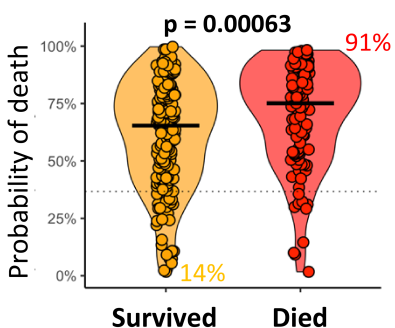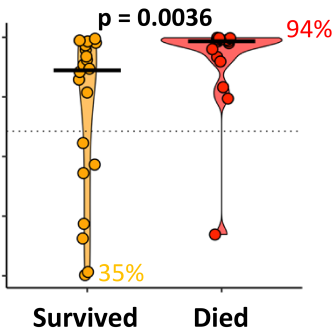

Supplement: ACN3-9-622-s007.pdf [file ACN3-9-622-s007.pdf]
